# Supplementary material for: SO2-promoted catalytic N2O removal over iron zeolites
Source: Royal Society of Chemistry journal article supplement (doi:10.1039/b811703a), 2008-01-01
Supplement: b811703a.pdf [file b811703a.pdf]

## Electronic Supplementary Information

**Table SII.** Summary of the catalysts evaluated in this study.

| Sample                            | Method                     | Parent zeolite or support                         | Si/Al ratio     | Metal precursor                                      | Fe / wt. % | Ref. <sup>b</sup> |
|-----------------------------------|----------------------------|---------------------------------------------------|-----------------|------------------------------------------------------|------------|-------------------|
| Fe-ZSM-5-st                       | Steam activation           | Home-made                                         | 31              | Fe(NO <sub>3</sub> ) <sub>3</sub> ·9H <sub>2</sub> O | 0.7        | 1                 |
| FeGa-ZSM-5-st                     | Steam activation           | Home made                                         | 32 <sup>a</sup> | Fe(NO <sub>3</sub> ) <sub>3</sub> ·9H <sub>2</sub> O | 0.6        | 1                 |
| Fe-silicalite-st                  | Steam activation           | Home made                                         | ∞               | Fe(NO <sub>3</sub> ) <sub>3</sub> ·9H <sub>2</sub> O | 0.7        | 1                 |
| ZSM-5-st                          | Steam activation           | CBV 8020, Zeolyst                                 | 37              | No iron added                                        | 0.017      | 1                 |
| Fe-ZSM-5-cvd                      | Chemical vapour deposition | CBV 3024E, Zeolyst                                | 15              | FeCl <sub>3</sub>                                    | 4.5        | 2                 |
| Fe-ZSM-5-lie,n                    | Liquid-ion exchange        | CBV 3024E, Zeolyst                                | 15              | Fe(NO <sub>3</sub> ) <sub>3</sub> ·9H <sub>2</sub> O | 0.8        | 1                 |
| Fe-ZSM-5-iw                       | Incipient wetness          | CBV 3024E, Zeolyst                                | 15              | FeSO <sub>4</sub> ·7H <sub>2</sub> O                 | 2.0        | 1                 |
| Fe-ZSM-5-lie                      | Liquid-ion exchange        | CBV 8014, Zeolyst                                 | 40              | FeSO <sub>4</sub> ·7H <sub>2</sub> O                 | 1.7        | 3                 |
| Fe-beta-lie                       | Liquid-ion exchange        | CP 814C, Zeolyst                                  | 19              | FeSO <sub>4</sub> ·7H <sub>2</sub> O                 | 1.8        | 3                 |
| Fe-mordenite-lie                  | Liquid-ion exchange        | CBV 21A, Zeolyst                                  | 10              | FeSO <sub>4</sub> ·7H <sub>2</sub> O                 | 1.6        | 3                 |
| Fe-ferrierite-lie                 | Liquid-ion exchange        | CP 914C, Zeolyst                                  | 10              | FeSO <sub>4</sub> ·7H <sub>2</sub> O                 | 1.7        | 3                 |
| Rh-ZSM-5-iw                       | Incipient wetness          | CBV 3024E, Zeolyst                                | 15              | RhCl <sub>3</sub>                                    | 0.4        | 4                 |
| Fe/Al <sub>2</sub> O <sub>3</sub> | Incipient wetness          | γ-Al <sub>2</sub> O <sub>3</sub> , 507-C, Aldrich | -               | FeSO <sub>4</sub> ·7H <sub>2</sub> O                 | 2.0        | 1                 |

<sup>a</sup> Si/Ga ratio.

<sup>b</sup> Recipes for the preparation of the catalysts have been adapted from the literature:

1. J. Pérez-Ramírez, F. Kapteijn, G. Mul, J.A. Moulijn, *J. Catal.* 2002, **208**, 211.
2. H.-Y. Chen, W.M.H. Sachtler, *Catal. Today* 1998, **42**, 73.
3. J.C. Groen, Ll. Maldonado, E. Berrier, A. Brückner, J.A. Moulijn, J. Pérez-Ramírez, *J. Phys. Chem. B* 2006, **110**, 20369.
4. J. Pérez-Ramírez, F. Kapteijn, G. Mul, X. Xu, J.A. Moulijn, *Catal. Today* 2002, **76**, 55.

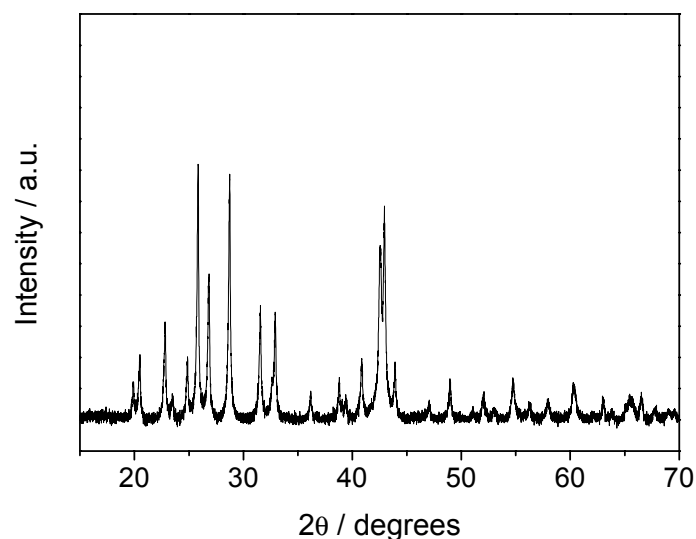

**Fig. S11.** X-ray diffraction pattern of the solid formed by precipitating the outlet gas of the  $\text{N}_2\text{O}+\text{SO}_2$  reaction over Fe-ZSM-5-st with a 0.2 M  $\text{BaNO}_3$  aqueous solution. The reflections correspond to  $\text{BaSO}_4$  (JCPDS 24-1035), supporting the formation of  $\text{SO}_3$  in the reaction. The pattern was measured in a Bruker AXS D8 Advance diffractometer equipped with a Cu tube, a Ge(111) incident beam monochromator, and a Vantec-1 PSD. Data were recorded with an angular step size of  $0.016^\circ$  and a counting time of 6 s per step.
